# Supplementary material
Source: PubMed Central journal article supplement (PMC4326094)

# Supplemental Figure 1

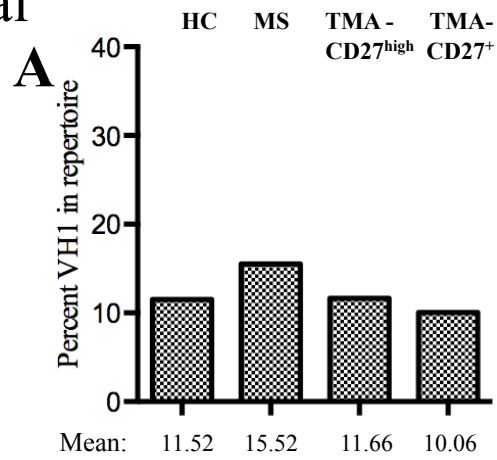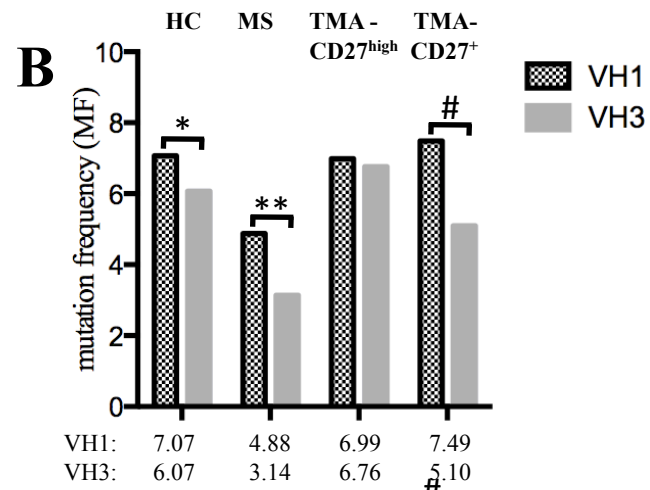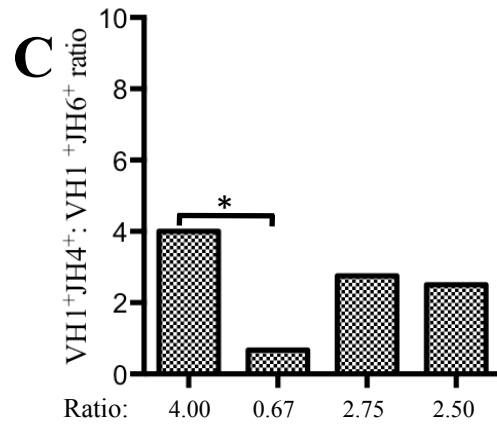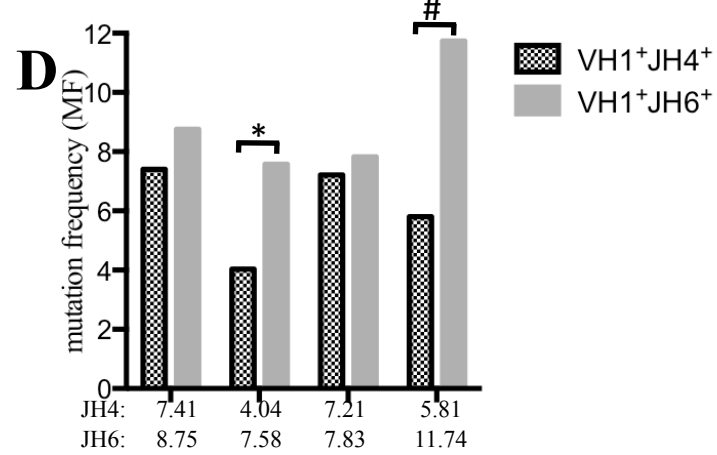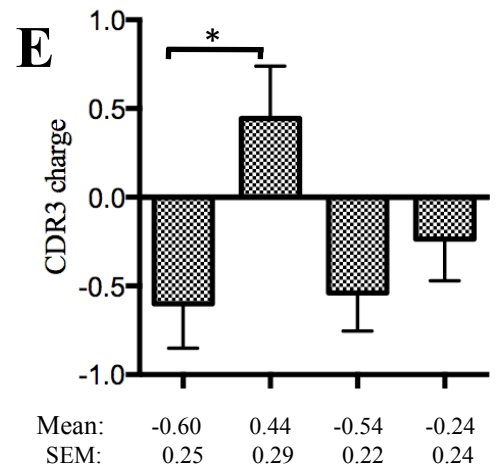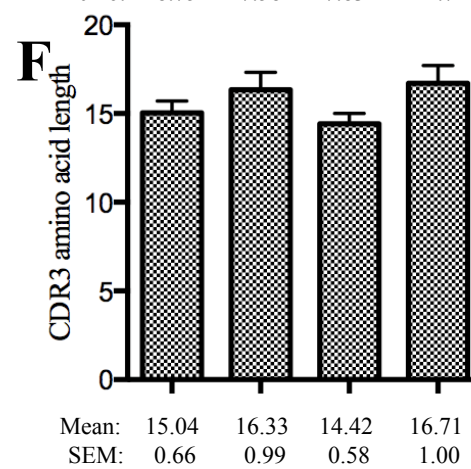

Supplement: NIHMS656948-supplement-sup_figure.pdf [file NIHMS656948-supplement-sup_figure.pdf]
